# Supplementary material
Source: PubMed Central journal article supplement (PMC7431179)
Supplement: mmc1.pdf [file mmc1.pdf]

# THE LANCET

## Supplementary appendix

This appendix formed part of the original submission. We post it as supplied by the authors.

Supplement to: Braun F, Lütgehetmann M, Pfefferle S, et al. SARS-CoV-2 renal tropism associates with acute kidney injury. *Lancet* 2020; published online August 17. [http://dx.doi.org/10.1016/S0140-6736\(20\)31759-1](http://dx.doi.org/10.1016/S0140-6736(20)31759-1).

## **Materials and methods:**

### *Autopsies*

All autopsies were performed at the Department of Legal Medicine of the University Medical Center Hamburg-Eppendorf. The Ethics Committee of the Hamburg Chamber of Physicians was informed about the study (WF-051/20). The median post-mortem interval was 5 days. Clinical and laboratory information is provided in **Table S1**.

### *Clinical data*

Principal comorbidities were assessed using the provided information by nursing homes, hospitals or private practices. Coronary heart disease, myocardial infarction and angina pectoris were grouped as one disease entity, while dementia and stroke were considered separate diseases. Hormonal abnormalities, diabetes and obesity were considered metabolic diseases. Liver diseases, malignancies and autoimmune diseases were considered other diseases. Acute kidney injury (AKI) was defined as the report of AKI, oliguria or the need for dialysis in the patient history as well as abnormalities in the bloodwork consistent with the KDIGO AKI definition. Of note, some patients died in nursing homes without full laboratory workup. For survival calculations, we estimated the interval between the first positive respiratory swab for SARS-CoV-2 (COVID-19 diagnosis) and date of death. Survival analysis was performed only within the first 21 days of clinical course as we detected imbalances in the number of patients from each group after this time point.

### *Quantitative RT-PCR for SARS-CoV-2*

A full protocol has been previously reported<sup>1</sup>. Briefly, autopsy kidney samples were stored at 4°C in RNA later solution (ThermoFisher; AM7021-500ML). All tissue samples were grinded (Precellys 24, Bertin, Rockville, US) using 2ml tubes prefilled with ceramic beads (Precellys Lysing Kit) and 1ml RNA and DNA free PCR grade water. For RNA/DNA extraction, 200µl of the grinded tissue lysate was transferred to the MagnaPure96 (Roche, Mannheim, Germany).

For virus quantification, a previously published assay was adopted with modifications using chimeric 2'-O-methyl RNA bases at the penultimate base of both primers (mG and mC) to reduce primer dimer formation<sup>2</sup>. The forward primer, 5'-ACAGGTACGTTAATAGTTAATAGCmGT-3' (400nM end concentration), 5'-TATTGCAGCAGTACGCACAmCA-3' (400nM end concentration) and probe 5'-Fam-ACACTAGCC/ZEN/ATCCTTACTGCGCTTCG-lowa Black FQ-3' (100nM end concentration) were used. Primer and probes were obtained from Integrated DNA Technologies (IDT, Leuven, Belgium). One-step RT-PCR (25µl volume) was run on the LightCycler480 system (Roche) using one step RNA control kit as master mix (Roche) and 5µl of eluate. Ct value for the target SARS-CoV-2 RNA (FAM) was determined using second derivative maximum method.

For quantification, standard in-vitro transcribed RNA (IVT-RNA) of the E gene of SARS-CoV-2 was used. The standard was obtained via the European Virus Archive<sup>3</sup>. Linear range of the assay is between 1x10<sup>3</sup> and 1x10<sup>9</sup> copies/ml. Quantitative β-globin PCR was performed with commercial TaqMan primer set (Thermo-Fischer, 401846) and Roche DNA control kit. PCR was run on the LightCycler480 system. The amount of DNA was normalized using human DNA standard (KR0454). SARS-CoV-2 RNA levels in tissues were normalized to β-globin DNA to adjust for differences in tissue input.

### *Cell culture and virus isolation*

Vero cells (ATCC® CRL-1586), which are kidney tubular epithelial cells retrieved from an African green monkey, were cultivated and stained with an antibody against non-structural protein 3 (nsp3; Rockland, 100-401-A52)<sup>4</sup>. For virus isolation, kidney tissues were homogenized as described<sup>5</sup> and 250µl of the homogenized tissue solution were used for infection. Virus growth was confirmed by RT-PCR of cell culture supernatants<sup>2</sup>.

### *Role of the funding source*

No funding source had a role in data collection, analysis, interpretation, writing of the manuscript or the decision to submit.

**Table S1.** General clinical data for all 63 autopsy cases.

| Patient no. | Sex    | Age | Place of death | PMI (days) | Principal Comorbidities | Respiratory Tract | CVD | Kidney | Brain | Metabolism | Other | AKI during COVID-19 | Creatinine at admission (μmol/l) | BUN at admission (mmol/l) | eGFR at admission (CKD-Epi - ml/min/1.73m <sup>2</sup> ) | Blood pressure Medication                    |
|-------------|--------|-----|----------------|------------|-------------------------|-------------------|-----|--------|-------|------------|-------|---------------------|----------------------------------|---------------------------|----------------------------------------------------------|----------------------------------------------|
| 1           | male   | 80  | NW             | 4          | 4                       | 1                 | 2   | 0      | 1     | 0          | 0     | y                   | 267.03                           | n.a.                      | 19                                                       | Ramipril, Bisoprolol, Torsemide              |
| 2           | female | 85  | NW             | 4          | 5                       | 0                 | 2   | 1      | 0     | 1          | 1     | y                   | 105.10                           | 7.00                      | 30                                                       | Ramipril, Metoprolol, Torsemide              |
| 3           | male   | 86  | NH             | 5          | 5                       | 1                 | 2   | 1      | 1     | 0          | 0     | n.a.                | n.a.                             | n.a.                      | n.a.                                                     | Torsemide, Propranolol, Spirinolactone       |
| 4           | male   | 94  | OH             | 23         | 6                       | 1                 | 3   | 1      | 1     | 0          | 0     | n.a.                | n.a.                             | n.a.                      | n.a.                                                     | Bisoprolol, Ramipril                         |
| 5           | male   | 75  | ICU            | 7          | 3                       | 0                 | 1   | 0      | 0     | 1          | 1     | y                   | 123.79                           | 8.51                      | n.a.                                                     | n.a.                                         |
| 6           | male   | 79  | ICU            | 4          | 2                       | 0                 | 2   | 0      | 0     | 0          | 0     | y                   | 81.35                            | 2.28                      | 78                                                       | n.a.                                         |
| 7           | female | 86  | NH             | 3          | 6                       | 0                 | 2   | 1      | 1     | 0          | 2     | n.a.                | n.a.                             | n.a.                      | n.a.                                                     | Urapidil, Amlodipine, Ramipril               |
| 8           | female | 91  | NW             | 5          | 3                       | 0                 | 1   | 1      | 1     | 0          | 0     | n.a.                | 87.54                            | 10.16                     | 53                                                       | n.a.                                         |
| 9           | female | 85  | NW             | 7          | 4                       | 1                 | 2   | 0      | 1     | 0          | 0     | n                   | 70.74                            | n.a.                      | 68                                                       | n.a.                                         |
| 10          | female | 84  | ICU            | 3          | 3                       | 1                 | 0   | 0      | 0     | 0          | 2     | n                   | 45.98                            | 3.12                      | 8                                                        | Torsemide                                    |
| 11          | male   | 83  | NW             | 9          | 3                       | 0                 | 3   | 0      | 0     | 0          | 0     | y                   | n.a.                             | n.a.                      | n.a.                                                     | HCT, Bioprolol, Candesartan, Amlodipine      |
| 12          | male   | 86  | ICU            | 5          | 5                       | 0                 | 2   | 1      | 1     | 0          | 1     | y                   | 123.79                           | n.a.                      | 47                                                       | Bisoprolol, Torsemide                        |
| 13          | male   | 71  | ICU            | 2          | 7                       | 1                 | 3   | 0      | 1     | 1          | 1     | y                   | 452.71                           | 15.23                     | 10                                                       | n.a.                                         |
| 14          | male   | 84  | ICU            | 4          | 3                       | 0                 | 2   | 0      | 0     | 1          | 0     | y                   | n.a.                             | n.a.                      | n.a.                                                     | n.a.                                         |
| 15          | male   | 81  | ICU            | 1          | 3                       | 0                 | 1   | 0      | 0     | 0          | 2     | y                   | 154.74                           | 4.49                      | 36                                                       | Ramipril, Torsemide                          |
| 16          | female | 88  | NW             | 4          | 6                       | 1                 | 1   | 0      | 2     | 0          | 2     | y                   | n.a.                             | n.a.                      | n.a.                                                     | n.a.                                         |
| 17          | female | 75  | NW             | 12         | 6                       | 1                 | 4   | 1      | 0     | 0          | 0     | y                   | 50.40                            | 2.50                      | 91                                                       | n.a.                                         |
| 18          | male   | 79  | OH             | 6          | 7                       | 0                 | 3   | 1      | 1     | 1          | 0     | n.a.                | 919.57                           | 20.68                     | 4                                                        | Metoprolol, Enalapril, Amlodipine, Doxazosin |
| 19          | female | 74  | NW             | 5          | 6                       | 1                 | 3   | 0      | 1     | 1          | 1     | y                   | 97.25                            | n.a.                      | 50                                                       | n.a.                                         |
| 20          | male   | 90  | NW             | 3          | 6                       | 0                 | 4   | 1      | 0     | 0          | 1     | n                   | 97.26                            | 7.34                      | 67                                                       | n.a.                                         |
| 21          | male   | 87  | NW             | 5          | 5                       | 1                 | 1   | 1      | 2     | 0          | 0     | y                   | 114.95                           | n.a.                      | 50                                                       | n.a.                                         |
| 22          | male   | 74  | ICU            | 8          | 4                       | 1                 | 1   | 1      | 1     | 0          | 0     | y                   | 185.68                           | n.a.                      | 30                                                       | n.a.                                         |
| 23          | female | 92  | NH             | 0          | 3                       | 0                 | 0   | 1      | 1     | 0          | 1     | n.a.                | n.a.                             | n.a.                      | n.a.                                                     | Amlodipine, Ramipril, Torsemide              |
| 24          | male   | 85  | NH             | 9          | 8                       | 1                 | 3   | 1      | 1     | 0          | 2     | n.a.                | n.a.                             | n.a.                      | n.a.                                                     | Torsemide, Amlodipine, Candesartan, Xipamide |
| 25          | male   | 83  | ER             | 2          | 1                       | 0                 | 1   | 0      | 0     | 0          | 0     | y                   | 548.20                           | n.a.                      | 8                                                        | n.a.                                         |
| 26          | female | 50  | ICU            | 4          | 5                       | 1                 | 1   | 0      | 0     | 0          | 3     | y                   | 106.10                           | n.a.                      | 55                                                       | n.a.                                         |
| 27          | male   | 71  | ICU            | 5          | 4                       | 0                 | 2   | 1      | 0     | 1          | 0     | y                   | n.a.                             | n.a.                      | n.a.                                                     | n.a.                                         |
| 28          | male   | 61  | NH             | 14         | 3                       | 0                 | 1   | 0      | 2     | 0          | 0     | n.a.                | n.a.                             | n.a.                      | n.a.                                                     | n.a.                                         |
| 29          | male   | 78  | ICU            | 0          | 5                       | 0                 | 3   | 1      | 0     | 0          | 1     | y                   | 190.10                           | n.a.                      | n.a.                                                     | n.a.                                         |
| 30          | male   | 90  | NW             | 5          | 4                       | 0                 | 2   | 1      | 0     | 0          | 1     | y                   | n.a.                             | n.a.                      | n.a.                                                     | n.a.                                         |
| 31          | female | 87  | NH             | 0          | 3                       | 1                 | 1   | 0      | 1     | 0          | 0     | n.a.                | n.a.                             | n.a.                      | n.a.                                                     | Carvedilol, Losartan, Amlodipine, Torsemide  |
| 32          | male   | 88  | NW             | 5          | 3                       | 1                 | 1   | 1      | 0     | 0          | 0     | y                   | 389.05                           | 44.86                     | 11                                                       | n.a.                                         |
| 33          | female | 85  | NW             | 0          | 5                       | 0                 | 3   | 1      | 0     | 0          | 1     | n.a.                | 254.65                           | 17.18                     | 14                                                       | n.a.                                         |
| 34          | female | 91  | NH             | 7          | 6                       | 1                 | 2   | 1      | 1     | 0          | 1     | n.a.                | n.a.                             | n.a.                      | n.a.                                                     | Torsemide, Spirinolactone                    |
| 35          | male   | 94  | NH             | 17         | 6                       | 0                 | 2   | 1      | 2     | 1          | 0     | n.a.                | n.a.                             | n.a.                      | n.a.                                                     | Torsemide                                    |
| 36          | male   | 78  | NW             | 6          | 4                       | 0                 | 1   | 0      | 1     | 1          | 1     | n.a.                | n.a.                             | n.a.                      | n.a.                                                     | n.a.                                         |
| 37          | male   | 32  | NW             | 0          | 1                       | 0                 | 0   | 0      | 0     | 0          | 1     | n                   | 31.83                            | 1.73                      | 165                                                      | Torsemide                                    |
| 38          | female | 71  | ICU            | 0          | 2                       | 0                 | 0   | 1      | 0     | 0          | 1     | n                   | 667.57                           | 0.83                      | 46                                                       | n.a.                                         |
| 39          | male   | 61  | ICU            | 4          | 5                       | 1                 | 2   | 0      | 0     | 1          | 1     | y                   | 105.22                           | 3.12                      | 66                                                       | Bisoprolol, Ramipril, Amlodipine             |
| 40          | female | 59  | ICU            | 0          | 1                       | 0                 | 0   | 0      | 0     | 0          | 1     | n.a.                | 58.36                            | 2.00                      | 97                                                       | n.a.                                         |
| 41          | female | 89  | NW             | 5          | 6                       | 0                 | 2   | 1      | 1     | 2          | 0     | y                   | 150.31                           | n.a.                      | 26                                                       | n.a.                                         |
| 42          | female | 78  | NH             | 17         | 2                       | 1                 | 1   | 0      | 0     | 0          | 0     | n.a.                | n.a.                             | n.a.                      | n.a.                                                     | n.a.                                         |
| 43          | female | 87  | NH             | 7          | 4                       | 0                 | 2   | 1      | 1     | 0          | 0     | n.a.                | n.a.                             | n.a.                      | n.a.                                                     | none                                         |
| 44          | female | 88  | NH             | 5          | 7                       | 1                 | 2   | 1      | 1     | 1          | 1     | n.a.                | n.a.                             | n.a.                      | n.a.                                                     | Amlodipine, Ramipril, Torsemide              |
| 45          | female | 87  | NW             | 10         | 6                       | 1                 | 2   | 0      | 1     | 1          | 1     | y                   | 102.57                           | 3.34                      | 43                                                       | Metoprolol, Ramipril, Torsemide              |
| 46          | female | 76  | OH             | 0          | 2                       | 1                 | 1   | 0      | 0     | 0          | 0     | n.a.                | n.a.                             | n.a.                      | n.a.                                                     | Metoprolol, Ramipril                         |
| 47          | male   | 55  | ICU            | 8          | 3                       | 0                 | 1   | 1      | 1     | 0          | 0     | n                   | 110.53                           | n.a.                      | 65                                                       | none                                         |
| 48          | female | 84  | NW             | 8          | 5                       | 0                 | 1   | 1      | 1     | 0          | 2     | y                   | 61.89                            | n.a.                      | 81                                                       | n.a.                                         |
| 49          | male   | 89  | NW             | 3          | 4                       | 0                 | 2   | 0      | 1     | 0          | 1     | y                   | 97.26                            | 8.00                      | 60                                                       | Candesartan, Bisoprolol                      |
| 50          | male   | 48  | NW             | 7          | 4                       | 0                 | 2   | 0      | 0     | 0          | 2     | y                   | 62.78                            | n.a.                      | 111                                                      | n.a.                                         |
| 51          | male   | 90  | NW             | 16         | 5                       | 1                 | 2   | 1      | 1     | 0          | 0     | n                   | n.a.                             | n.a.                      | n.a.                                                     | n.a.                                         |
| 52          | female | 72  | ICU            | 2          | 2                       | 0                 | 0   | 0      | 0     | 1          | 1     | y                   | 70.74                            | 2.33                      | 74                                                       | n.a.                                         |
| 53          | female | 83  | ICU            | 0          | 2                       | 1                 | 0   | 0      | 0     | 0          | 1     | y                   | 92.84                            | 5.15                      | 49                                                       | n.a.                                         |
| 54          | female | 80  | NH             | 10         | 3                       | 0                 | 1   | 0      | 1     | 1          | 0     | n.a.                | n.a.                             | n.a.                      | n.a.                                                     | Torsemide, Ramipril                          |
| 55          | male   | 56  | NW             | 3          | 4                       | 0                 | 1   | 1      | 1     | 1          | 0     | n.a.                | 857.67                           | 19.01                     | 8                                                        | n.a.                                         |
| 56          | male   | 84  | NW             | 9          | 4                       | 0                 | 2   | 1      | 0     | 1          | 0     | y                   | 247.58                           | 13.17                     | 20                                                       | Metoprolol                                   |
| 57          | male   | 71  | ICU            | 9          | 3                       | 0                 | 2   | 0      | 1     | 0          | 0     | n.a.                | 150.31                           | 9.67                      | 40                                                       | n.a.                                         |
| 58          | male   | 86  | OH             | 0          | 3                       | 0                 | 1   | 1      | 0     | 1          | 0     | n.a.                | n.a.                             | n.a.                      | n.a.                                                     | n.a.                                         |
| 59          | male   | 75  | ICU            | 4          | 4                       | 1                 | 2   | 1      | 0     | 0          | 0     | y                   | 203.37                           | 26.02                     | 26                                                       | n.a.                                         |
| 60          | male   | 74  | OH             | 9          | 3                       | 1                 | 2   | 0      | 0     | 0          | 0     | n.a.                | n.a.                             | n.a.                      | n.a.                                                     | n.a.                                         |
| 61          | male   | 51  | NW             | 8          | 2                       | 0                 | 0   | 0      | 1     | 0          | 1     | y                   | n.a.                             | n.a.                      | n.a.                                                     | n.a.                                         |
| 62          | male   | 58  | ICU            | 2          | 3                       | 0                 | 0   | 0      | 1     | 1          | 1     | y                   | 150.31                           | 17.51                     | 44                                                       | n.a.                                         |
| 63          | female | 88  | OH             | 0          | 4                       | 0                 | 2   | 1      | 1     | 0          | 0     | n.a.                | n.a.                             | n.a.                      | n.a.                                                     | Metoprolol, Ramipril, Torsemide              |

**Legend:** PMI: post-mortem interval, CVD: cardiovascular disease, AKI: acute kidney injury, BUN: blood urea nitrogen, eGFR: estimated glomerular filtration rate (ml/min/1.73m<sup>2</sup>), NW: normal hospital ward, NH: nursing home, OH: own home, ICU: intensive care unit, ER: emergency room, n.a.: not available, y: yes, n: no, HCT: Hydrochlorothiazide

**Table S2.** General clinical data for all 39 cases with defined kidney clinical status.

| Group: renal SARS-CoV-2 tropism / AKI during COVID-19 | Patient no. | Sex    | Age | Principal Comorbidities | Creatinine at admission (μmol/l) | BUN at admission (mmol/l) | eGFR at admission (CKD-Epi - ml/min/1,73m <sup>2</sup> ) | Blood pressure Medication               |
|-------------------------------------------------------|-------------|--------|-----|-------------------------|----------------------------------|---------------------------|----------------------------------------------------------|-----------------------------------------|
| no / no                                               | 37          | male   | 32  | 1                       | 31,83                            | 1,73                      | 165                                                      | Torsemide                               |
| no / no                                               | 38          | female | 71  | 2                       | 667,57                           | 0,83                      | 46                                                       | n.a.                                    |
| no / no                                               | 47          | male   | 55  | 3                       | 110,53                           | n.a.                      | 65                                                       | none                                    |
| no / no                                               | 51          | male   | 90  | 5                       | n.a.                             | n.a.                      | n.a.                                                     | n.a.                                    |
| no / yes                                              | 5           | male   | 75  | 3                       | 123,79                           | 8,51                      | n.a.                                                     | n.a.                                    |
| no / yes                                              | 6           | male   | 79  | 2                       | 81,35                            | 2,28                      | 78                                                       | n.a.                                    |
| no / yes                                              | 14          | male   | 84  | 3                       | n.a.                             | n.a.                      | n.a.                                                     | n.a.                                    |
| no / yes                                              | 17          | female | 75  | 6                       | 50,40                            | 2,50                      | 91                                                       | n.a.                                    |
| no / yes                                              | 27          | male   | 71  | 4                       | n.a.                             | n.a.                      | n.a.                                                     | n.a.                                    |
| no / yes                                              | 29          | male   | 78  | 5                       | 190,10                           | n.a.                      | n.a.                                                     | n.a.                                    |
| no / yes                                              | 39          | male   | 61  | 5                       | 105,22                           | 3,12                      | 66                                                       | Bisoprolol, Ramipril, Amlodipine        |
| no / yes                                              | 59          | male   | 75  | 4                       | 203,37                           | 26,02                     | 26                                                       | n.a.                                    |
| no / yes                                              | 62          | male   | 58  | 3                       | 150,31                           | 17,51                     | 44                                                       | n.a.                                    |
| yes / no                                              | 9           | female | 85  | 4                       | 70,74                            | n.a.                      | 68                                                       | n.a.                                    |
| yes / no                                              | 10          | female | 84  | 3                       | 45,98                            | 3,12                      | 8                                                        | Torsemide                               |
| yes / no                                              | 20          | male   | 90  | 6                       | 97,26                            | 7,34                      | 67                                                       | n.a.                                    |
| yes / yes                                             | 1           | male   | 80  | 4                       | 267,03                           | n.a.                      | 19                                                       | Ramipril, Bisoprolol, Torsemide         |
| yes / yes                                             | 2           | female | 85  | 5                       | 106,10                           | 7,00                      | 30                                                       | Ramipril, Metoprolol, Torsemide         |
| yes / yes                                             | 11          | male   | 83  | 3                       | n.a.                             | n.a.                      | n.a.                                                     | HCT, Bioprolol, Candesartan, Amlodipine |
| yes / yes                                             | 12          | male   | 86  | 5                       | 123,79                           | n.a.                      | 47                                                       | Bisoprolol, Torsemide                   |
| yes / yes                                             | 13          | male   | 71  | 7                       | 452,71                           | 15,23                     | 10                                                       | n.a.                                    |
| yes / yes                                             | 15          | male   | 81  | 3                       | 154,74                           | 4,49                      | 36                                                       | Ramipril, Torsemide                     |
| yes / yes                                             | 16          | female | 88  | 6                       | n.a.                             | n.a.                      | n.a.                                                     | n.a.                                    |
| yes / yes                                             | 19          | female | 74  | 6                       | 97,26                            | n.a.                      | 50                                                       | n.a.                                    |
| yes / yes                                             | 21          | male   | 87  | 5                       | 114,95                           | n.a.                      | 50                                                       | n.a.                                    |
| yes / yes                                             | 22          | male   | 74  | 4                       | 185,68                           | n.a.                      | 30                                                       | n.a.                                    |
| yes / yes                                             | 25          | male   | 83  | 1                       | 548,20                           | n.a.                      | 8                                                        | n.a.                                    |
| yes / yes                                             | 26          | female | 50  | 5                       | 106,10                           | 10,51                     | 55                                                       | n.a.                                    |
| yes / yes                                             | 30          | male   | 90  | 4                       | n.a.                             | n.a.                      | n.a.                                                     | n.a.                                    |
| yes / yes                                             | 32          | male   | 88  | 3                       | 389,05                           | 44,86                     | 11                                                       | n.a.                                    |
| yes / yes                                             | 41          | female | 89  | 6                       | 150,31                           | n.a.                      | 26                                                       | n.a.                                    |
| yes / yes                                             | 45          | female | 87  | 6                       | 102,57                           | 3,34                      | 43                                                       | Metoprolol, Ramipril, Torsemide         |
| yes / yes                                             | 48          | female | 84  | 5                       | 61,89                            | n.a.                      | 81                                                       | n.a.                                    |
| yes / yes                                             | 49          | male   | 89  | 4                       | 97,26                            | 8,00                      | 60                                                       | Candesartan, Bisoprolol                 |
| yes / yes                                             | 50          | male   | 48  | 4                       | 62,78                            | n.a.                      | 111                                                      | n.a.                                    |
| yes / yes                                             | 52          | female | 72  | 2                       | 70,74                            | 2,33                      | 74                                                       | n.a.                                    |
| yes / yes                                             | 53          | female | 83  | 2                       | 92,84                            | 5,15                      | 49                                                       | n.a.                                    |
| yes / yes                                             | 56          | male   | 84  | 4                       | 247,58                           | 13,17                     | 20                                                       | Metoprolol                              |
| yes / yes                                             | 61          | male   | 51  | 2                       | n.a.                             | n.a.                      | n.a.                                                     | n.a.                                    |

**Legend:** AKI: acute kidney injury, BUN: blood urea nitrogen, eGFR: estimated glomerular filtration rate (ml/min/1,73m<sup>2</sup>), n.a.: not available, y: yes, n: no, HCT: Hydrochlorothiazide

**Table S3.** Definition of acute kidney injury in 32 cases

| Patient no. | Comorbidities detail                                                           | AKI (history / bloodwork) | AKI term                                |
|-------------|--------------------------------------------------------------------------------|---------------------------|-----------------------------------------|
| 1           | Emphysema, aHT, AF, Dementia                                                   | history                   | acute kidney failure                    |
| 2           | AF, CI, CKD, Hypothyroidism, follicular Lymphoma                               | bloodwork                 |                                         |
| 5           | aHT, Diabetes, Steatohepatitis                                                 | history                   | acute kidney failure, need for dialysis |
| 6           | AF, Cardiomyopathy                                                             | bloodwork                 |                                         |
| 11          | aHT, MI, Cardiomyopathy                                                        | history                   | acute kidney failure                    |
| 12          | aHT, AF, MGN, Dementia, Monoclonal Gammopathy                                  | history                   | acute kidney failure                    |
| 13          | Asbestosis, aHT, MI, AV-Block III, Stroke, Diabetes, Prostate Cancer           | bloodwork                 |                                         |
| 14          | aHT, CHD, Diabetes                                                             | history                   | decreasing diuresis, need for dialysis  |
| 15          | CHD, Myelofibrosis, Steatohepatitis                                            | history                   | acute kidney failure                    |
| 16          | Emphysema, aHT, Demetia, Stroke, Autoimmune hepatitis, Thyroid Cancer          | history                   | acute kidney failure                    |
| 17          | COPD, MI, Cardiomyopathy, VHD, PAOD, CKD                                       | bloodwork                 |                                         |
| 19          | COPD, aHT, CHD, CI, Dementia, Diabetes, Steatohepatitis                        | history                   | decrease in GFR                         |
| 21          | Emphysema, Cardiomyopathy, CKD, Dementia, PD                                   | history                   | acute kidney failure                    |
| 22          | Emphysema, MI, CKD, Dementia                                                   | history                   | acute kidney failure                    |
| 25          | Cardiomyopathy                                                                 | history                   | acute kidney failure                    |
| 26          | COPD, aHT, chronic Pancreatitis, Gastric Ulcer, Cirrhosis                      | history                   | acute kidney failure                    |
| 27          | aHT, AF, CKD, Diabetes                                                         | bloodwork                 |                                         |
| 29          | aHT, MI, AV-Block I, CKD, RA                                                   | history                   | acute kidney failure                    |
| 30          | CHD, AF, CKD, MDS                                                              | history                   | acute kidney failure                    |
| 32          | Emphysema, CHD, CKD                                                            | history                   | acute kidney failure                    |
| 39          | PF, aHT, Cardiomyopathy, Diabetes, Sarcoidosis                                 | bloodwork                 |                                         |
| 41          | aHT, Cardiomyopathy, CKD, angiopathic Encephalopathy, Diabetes, Hypothyroidism | history                   | acute kidney failure                    |
| 45          | Emphysema, AF, Cardiomyopathy, Stroke, Diabetes, Myelofibrosis                 | bloodwork                 |                                         |
| 48          | aHT, CKD, PD, ALS, Breast Cancer                                               | history                   | acute kidney failure                    |
| 49          | aHT, PAOD, Stroke, Sarcoidosis                                                 | history                   | acute kidney failure                    |
| 50          | CHD, Cardiomyopathy, AML, Steatohepatitis                                      | bloodwork                 |                                         |
| 52          | Diabetes, Myelofibrosis                                                        | bloodwork                 |                                         |
| 53          | COPD, NHL                                                                      | history                   | acute kidney failure                    |
| 56          | CHD, Cardiomyopathy, CKD, Diabetes                                             | history                   | acute kidney failure                    |
| 59          | Emphysema, aHT, AF, CKD                                                        | history                   | acute kidney failure, need for dialysis |
| 61          | Epilepsy, Cirrhosis                                                            | history                   | acute kidney failure                    |
| 62          | Dementia, Obesity, Trisomy 21                                                  | bloodwork                 |                                         |

**Legend:** aHT: arterial hypertension, AF: atrial fibrillation, CI: cardiac insufficiency, CKD: chronic kidney disease, MI: myocardial infarction, MGN: membranous glomerulonephritis, CHD: coronary heart disease, COPD: chronic obstructive pulmonary disease, VHD: valvular heart disease, PAOD: peripheral arterial occlusive disease, PD: Parkinson's disease, RA: rheumatoid arthritis, MDS: myelodysplastic syndrome, PF: pulmonary fibrosis, ALS: amyotrophic lateral sclerosis, AML: acute myeloid leukemia, NHL: non-Hodgkin's lymphoma

**Fig. S1.** Renal function dynamics in selected patients with SARS-CoV-2 renal tropism

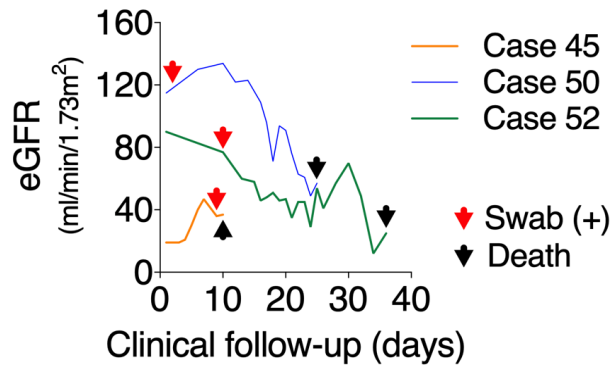

**Legend:** Three selected patients were followed up with serial bloodwork for a maximum of 7 days prior to COVID-19 diagnosis until death. All cases were SARS-CoV-2 PCR positive in the respiratory tract and the kidney. All three cases developed AKI in the context of COVID-19 infection. Case 45 suffered a first episode of AKI after orthopaedic surgery. Following a brief recovery period, the patient developed AKI and was diagnosed with COVID-19 before death.

**Fig. S2.** Viral replication detection in non-human primate kidney epithelial cells after infection with patient-derived SARS-CoV-2

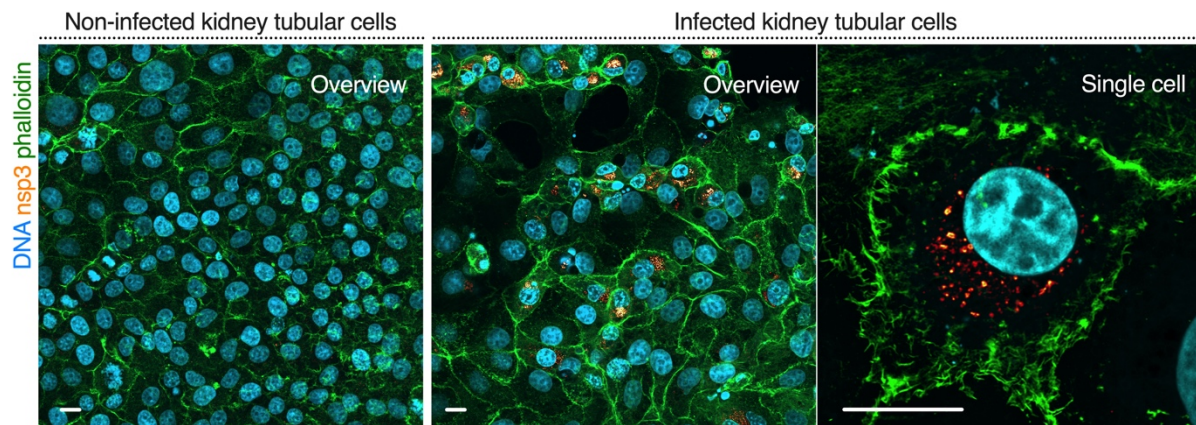

**Legend:** Expression of non-structural protein 3 (nsp3) as an indicator of replicating patient-derived SARS-CoV-2 in kidney tubular epithelial cells from non-human primates (Vero cells). Scale bar 10µm

### **Supplementary References:**

1. Puelles VG, et al. "Multi-organ and renal tropism of SARS-CoV-2". N Engl J Med 2020 DOI: 10.1056/NEJMc2011400.
2. Pfefferle S, Reucher S, Norz D, Lütgehetmann M. Evaluation of a quantitative RT-PCR assay for the detection of the emerging coronavirus SARS-CoV-2 using a high throughput system. Euro Surveill. 2020;25(9).
3. Romette JL, Prat CM, Gould EA, et al. The European Virus Archive goes global: A growing resource for research. Antiviral Res. 2018;158:127–134.
4. Pfefferle, S., et al., Low and high infection dose transmission of SARS-CoV-2 in the first COVID-19 clusters in Northern Germany; medRxiv 2020.06.11.20127332; doi: <https://doi.org/10.1101/2020.06.11.20127332>
5. Wichmann, D., et al., Autopsy Findings and Venous Thromboembolism in Patients With COVID-19: A Prospective Cohort Study. Ann Intern Med, 2020.

FB, ML, SP, MNW, AC, MTL, and DN did the experiments and analysed and interpreted data. FH, KM, DW, SK, ASS, and CE collected data. OG and KP provided support. CE, MA, VGP, and TBH supervised the study. VGP and TBH wrote the Correspondence. All authors revised the Correspondence.
